# Supplementary material for: Analysis of the Microbial Intestinal Tract in Broiler Chickens during the Rearing Period
Source: MDPI journal article supplement (doi:10.3390/biology10090942), 2021-09-21
Supplement: s1 [file s1]

**Table S1.** Ingredients and chemical composition of the commercial diets at different ages (in days, d).

| Ingredients, g/100g as-fed     | Diet            |                   |                    |                   |
|--------------------------------|-----------------|-------------------|--------------------|-------------------|
|                                | Starter (0–12d) | Grower 1 (12–26d) | Grower 2 (26–35 d) | Finisher (35–47d) |
| Corn                           | 35              | 50                | 51                 | 50                |
| Soybean meal 48%               | 27.15           | 28.9              | 26                 | 23.5              |
| Soybean                        | 10              | 3                 | 2                  | 2                 |
| Wheat                          | 10              | 0                 | 0                  | 0                 |
| Wheat pollard                  | 9               | 9                 | 10                 | 15                |
| Animal Fat                     | 3.9             | 4.5               | 6.4                | 5.3               |
| Dicalcium Phosphate            | 1.75            | 1.5               | 1.5                | 1.2               |
| Mineral-vitamin premix 1       | 2.5             | 2.5               | 2.5                | 2.5               |
| Calcium carbonate              | 0.7             | 0.6               | 0.6                | 0.5               |
| <b>Chemical composition:</b>   |                 |                   |                    |                   |
| Dry matter (DM), g/100g as fed | 88.89           | 88.66             | 89.26              | 90.08             |
| Protein, g/100g DM             | 21.45           | 19.67             | 18.76              | 18.46             |
| Lipid, g/100g DM               | 8.99            | 7.23              | 7.75               | 7.86              |
| Crude fiber, g/100g DM         | 3.65            | 3.07              | 3.38               | 3.35              |
| Ash, g/100g DM                 | 5.59            | 5.61              | 5.82               | 5.34              |
| Calcium, g/100g DM             | 0.87            | 0.84              | 0.78               | 0.63              |
| Sodium, g/100g DM              | 0.18            | 0.16              | 0.17               | 0.17              |
| Phosphorus, g/100g DM          | 0.61            | 0.61              | 0.59               | 0.55              |
| Lysine, Lys                    | 1.37            | 1.44              | 1.42               | 1.29              |
| Methionine, Met                | 0.75            | 0.76              | 0.70               | 0.58              |
| Metabolizable Energy (kcal/kg) | 3200            | 3060              | 3062               | 3060              |

Provided per kg of premix: copper (9.60 mg), iodine (0.60 mg), iron (60 mg), manganese (84 mg), molybdenum (2.4 mg), selenium (0.24 mg), zinc (84 mg), aminoacids (3520 mg), sennic protease (15.000 PROT), enzymes (2000 PPU); vitamin A (10.000 UI), vitamin D3 (3.000 UI), biotin (0.12 mg), colin (150 mg), vitamin E (36 m).

**Table S2.** Number of sequences per sample remaining after quality trimming.

| Sample | Initial | Trimmed and Filtered | Merged | No_Chimera | No_Host | Genus  | Species |
|--------|---------|----------------------|--------|------------|---------|--------|---------|
| S11D1  | 155725  | 131316               | 130172 | 130111     | 130026  | 129720 | 7155    |
| S11D2  | 172959  | 146685               | 145963 | 145439     | 145252  | 144518 | 14732   |
| S11D3  | 155757  | 129945               | 128829 | 128119     | 128119  | 122060 | 17470   |
| S11J1  | 100403  | 84855                | 83146  | 80055      | 80055   | 76869  | 23553   |
| S11J2  | 96457   | 80479                | 78450  | 76428      | 76428   | 71652  | 5380    |
| S11J3  | 284694  | 235590               | 232560 | 229173     | 229173  | 195846 | 23491   |
| S11I1  | 56127   | 47604                | 46700  | 45414      | 45414   | 45352  | 260     |
| S11I2  | 109270  | 93389                | 91437  | 84653      | 84653   | 84031  | 2361    |
| S11I3  | 81089   | 69404                | 67735  | 60978      | 60978   | 60534  | 847     |
| S11C1  | 201115  | 150152               | 142427 | 138636     | 138636  | 88011  | 19689   |
| S11C2  | 103466  | 77477                | 74988  | 74389      | 74389   | 49074  | 14959   |
| S11C3  | 188203  | 140214               | 129331 | 122875     | 122875  | 79901  | 28895   |
| S25D1  | 85731   | 72462                | 71325  | 70799      | 70795   | 69926  | 15600   |
| S25D2  | 269564  | 231954               | 229663 | 223224     | 223224  | 222896 | 62320   |
| S25D3  | 124760  | 106068               | 105005 | 102426     | 102426  | 100705 | 55393   |
| S25J1  | 102118  | 86238                | 85269  | 83639      | 83639   | 79809  | 18989   |
| S25J2  | 88506   | 75288                | 74378  | 72797      | 72797   | 70876  | 48528   |
| S25J3  | 143917  | 121291               | 119620 | 116094     | 116094  | 111861 | 61677   |
| S25I1  | 251426  | 189710               | 180212 | 175858     | 175858  | 132507 | 45822   |
| S25I2  | 157137  | 132868               | 131407 | 122161     | 122161  | 121788 | 14414   |
| S25I3  | 77947   | 59127                | 54608  | 53412      | 53412   | 40184  | 13041   |
| S25C1  | 152351  | 113563               | 105270 | 102057     | 102057  | 73673  | 26156   |
| S25C2  | 234618  | 175753               | 165794 | 158574     | 158574  | 128640 | 39908   |
| S25C3  | 276468  | 205623               | 194236 | 188500     | 188500  | 131398 | 41917   |
| S34D1  | 114522  | 98654                | 97782  | 97300      | 97270   | 96302  | 63842   |
| S34D2  | 82072   | 71071                | 70406  | 70097      | 70071   | 69917  | 19950   |
| S34D3  | 148855  | 128055               | 126996 | 124737     | 124737  | 124382 | 54452   |
| S34J1  | 81943   | 69947                | 69139  | 68356      | 68356   | 67151  | 22299   |
| S34J2  | 78781   | 64537                | 63747  | 62518      | 62518   | 60126  | 26441   |
| S34J3  | 100530  | 85687                | 84907  | 84282      | 84282   | 82576  | 65492   |
| S34I1  | 310644  | 259590               | 253994 | 241250     | 241250  | 224948 | 98722   |
| S34I2  | 80280   | 65582                | 64130  | 61593      | 61593   | 61208  | 21406   |
| S34I3  | 75776   | 64583                | 63814  | 61999      | 61999   | 61962  | 10122   |
| S34C1  | 154200  | 122450               | 117806 | 115556     | 115556  | 86367  | 30923   |
| S34C2  | 93423   | 71575                | 67817  | 67264      | 67264   | 38684  | 10274   |
| S34C3  | 119049  | 90811                | 83722  | 82718      | 82718   | 52143  | 16434   |
| S46D1  | 97903   | 85053                | 84659  | 84063      | 84063   | 83941  | 80380   |
| S46D2  | 86793   | 75206                | 74521  | 73752      | 73752   | 73556  | 15876   |
| S46D3  | 81431   | 70139                | 69463  | 68965      | 68948   | 68929  | 47511   |
| S46J1  | 81917   | 70638                | 69951  | 68227      | 68227   | 66036  | 54013   |
| S46J2  | 45400   | 38751                | 38064  | 37761      | 37761   | 36161  | 25695   |
| S46J3  | 112362  | 96359                | 95086  | 92747      | 92747   | 90968  | 62639   |
| S46I1  | 73947   | 62336                | 59778  | 54557      | 54557   | 53848  | 26513   |
| S46I2  | 76940   | 64858                | 63532  | 59753      | 59753   | 59704  | 17098   |
| S46I3  | 75292   | 61827                | 60068  | 57234      | 57234   | 56838  | 18729   |
| S46C1  | 56941   | 42717                | 39484  | 39212      | 39212   | 26729  | 7676    |
| S46C2  | 83678   | 62680                | 59224  | 58845      | 58845   | 36110  | 9470    |
| S46C3  | 124489  | 91682                | 86012  | 84789      | 84789   | 44231  | 11501   |

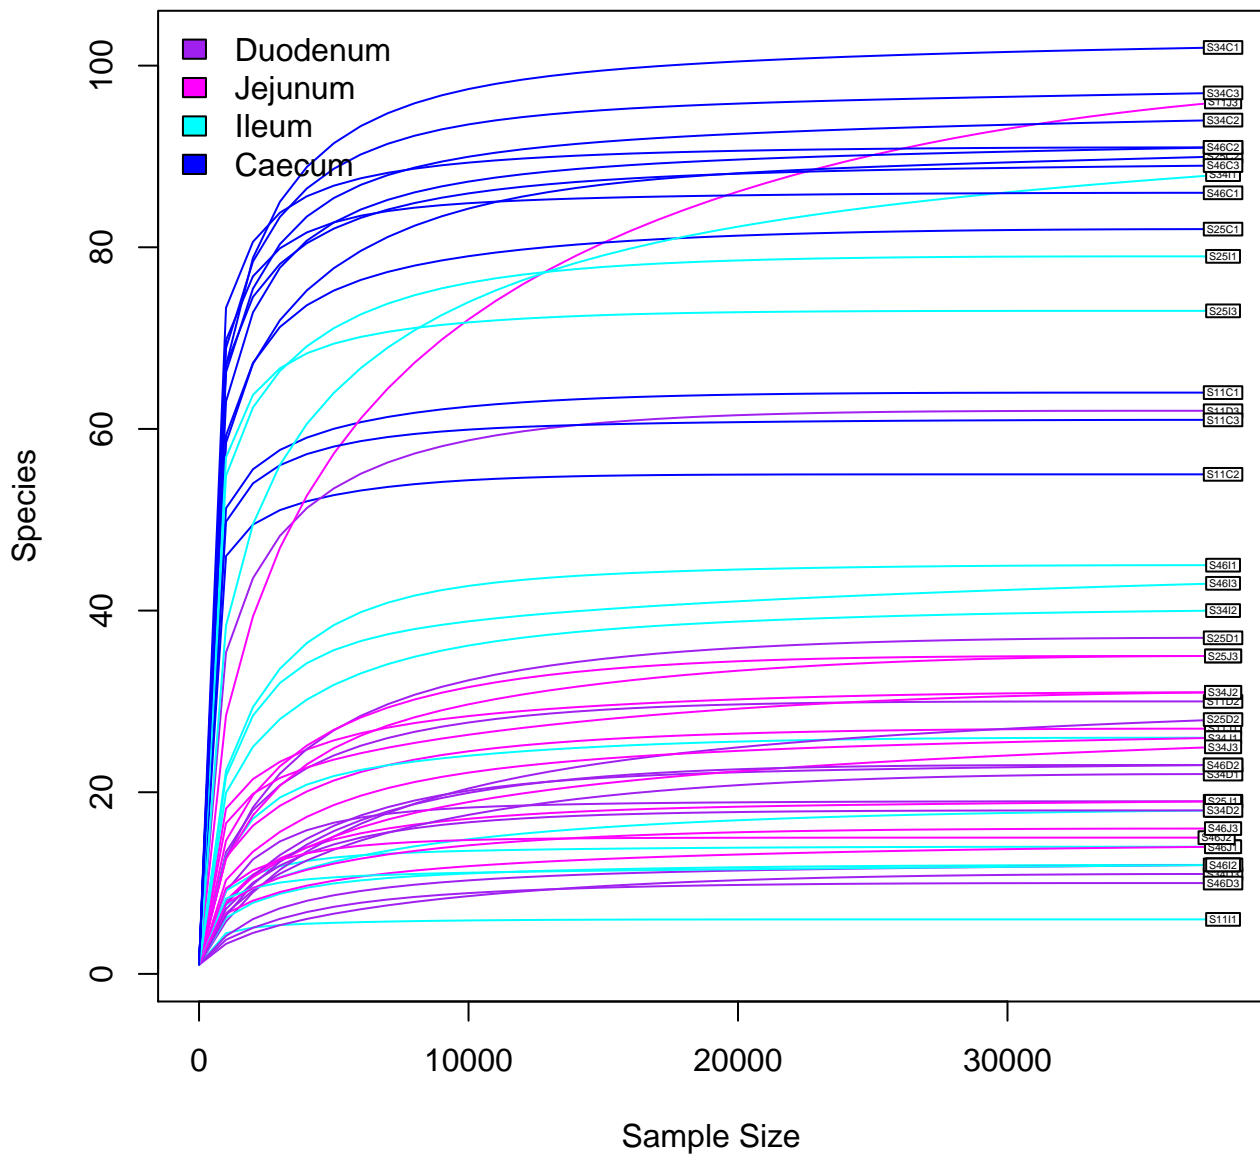

**Figure S1.** Rarefactions curves for the samples.

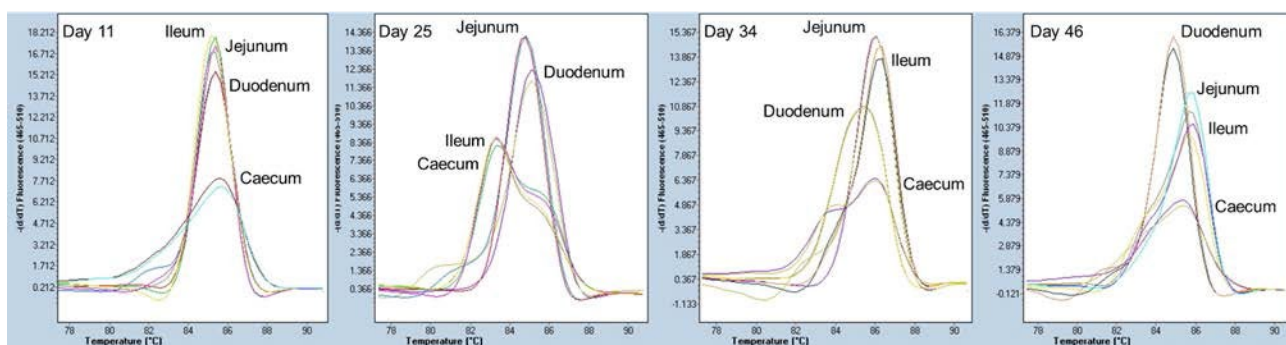

**Figure S2.** First derivative obtained by real-time PCR 16S rRNA gene amplification of melting curves from samples of the four intestine segments at ages (in days) 11, 25 34 and 46.

**Table S3.** Detection and absolute quantification of bacterial 16S rRNA gene in the four intestine segments and ages (in days) of chickens. Melting temperature peaks (*T<sub>m</sub>*), average threshold cycle (*C<sub>t</sub>*), average number of copies per nanogram of total DNA and standard deviation (S.D.) obtained from two replicates.

| Intestine segment | Age               | <i>T<sub>m</sub></i> ± S.D. | <i>C<sub>t</sub></i> ± S.D.  | Number of copies/ ng DNA ± S.D.  |
|-------------------|-------------------|-----------------------------|------------------------------|----------------------------------|
| Duodenum          | 11                | 85.29 <sup>AB</sup> ± 0.11  | 20.69 <sup>A</sup> ± 1.05    | 4.8E+02 <sup>E</sup> ± 2.2E+02   |
|                   | 25                | 84.96 <sup>AB</sup> ± 0.25  | 17.25 <sup>ABCD</sup> ± 1.63 | 5.3E+03 <sup>E</sup> ± 4.5E+03   |
|                   | 34                | 84.94 <sup>AB</sup> ± 0.36  | 17.61 <sup>ABC</sup> ± 2.07  | 1.6E+04 <sup>DE</sup> ± 2.2E+04  |
|                   | 46                | 84.52 <sup>B</sup> ± 0.54   | 16.16 <sup>CDE</sup> ± 1.57  | 6.5E+03 <sup>DE</sup> ± 4.4E+03  |
| Jejunum           | 11                | 85.20 <sup>AB</sup> ± 0.36  | 19.94 <sup>AB</sup> ± 1.49   | 1.5E+04 <sup>DE</sup> ± 1.1E+04  |
|                   | 25                | 84.99 <sup>AB</sup> ± 0.18  | 17.23 <sup>ABCD</sup> ± 0.27 | 6.1E+03 <sup>DE</sup> ± 3.8E+03  |
|                   | 34                | 85.74 <sup>A</sup> ± 0.27   | 17.15 <sup>ABCD</sup> ± 0.83 | 8.3E+03 <sup>DE</sup> ± 6.8E+03  |
|                   | 46                | 85.13 <sup>AB</sup> ± 0.78  | 16.63 <sup>BCD</sup> ± 0.15  | 9.0E+03 <sup>DE</sup> ± 2.3E+03  |
| Ileum             | 11                | 85.24 <sup>AB</sup> ± 0.09  | 13.99 <sup>DEF</sup> ± 1.59  | 8.2E+04 <sup>CDE</sup> ± 4.0E+04 |
|                   | 25                | 84.48 <sup>AB</sup> ± 0.19  | 12.27 <sup>F</sup> ± 1.34    | 1.4E+05 <sup>ABC</sup> ± 1.1E+05 |
|                   | 34                | 85.10 <sup>AB</sup> ± 0.89  | 12.34 <sup>F</sup> ± 0.87    | 7.4E+04 <sup>CDE</sup> ± 3.3E+04 |
|                   | 46                | 85.73 <sup>A</sup> ± 0.11   | 11.55 <sup>F</sup> ± 0.84    | 2.3E+05 <sup>A</sup> ± 3.2E+04   |
| Caecum            | 11                | 85.14 <sup>AB</sup> ± 0.24  | 11.87 <sup>F</sup> ± 0.33    | 1.1E+05 <sup>BCD</sup> ± 1.6E+04 |
|                   | 25                | 84.12 <sup>B</sup> ± 0.76   | 11.34 <sup>F</sup> ± 0.60    | 1.9E+05 <sup>AB</sup> ± 3.4E+04  |
|                   | 34                | 84.77 <sup>AB</sup> ± 0.52  | 12.75 <sup>EF</sup> ± 0.32   | 7.1E+04 <sup>CDE</sup> ± 9.9E+03 |
|                   | 46                | 85.21 <sup>AB</sup> ± 0.42  | 14.50 <sup>CDEF</sup> ± 1.51 | 3.3E+04 <sup>DE</sup> ± 1.6E+04  |
| <i>p-value</i>    | Age               | 0.014                       | 0.000                        | 0.018                            |
|                   | Intestine segment | 0.083                       | 0.000                        | 0.000                            |
|                   | AxT               | 0.061                       | 0.002                        | 0.000                            |

*p*-values associated with age (A), intestine segment (T) and their interaction (AxT). <sup>A-E</sup> For each column, different group of letters indicates statistical significant differences (*p*-value < 0.05) between them tested using the Tukey's Honest Significant Difference test.

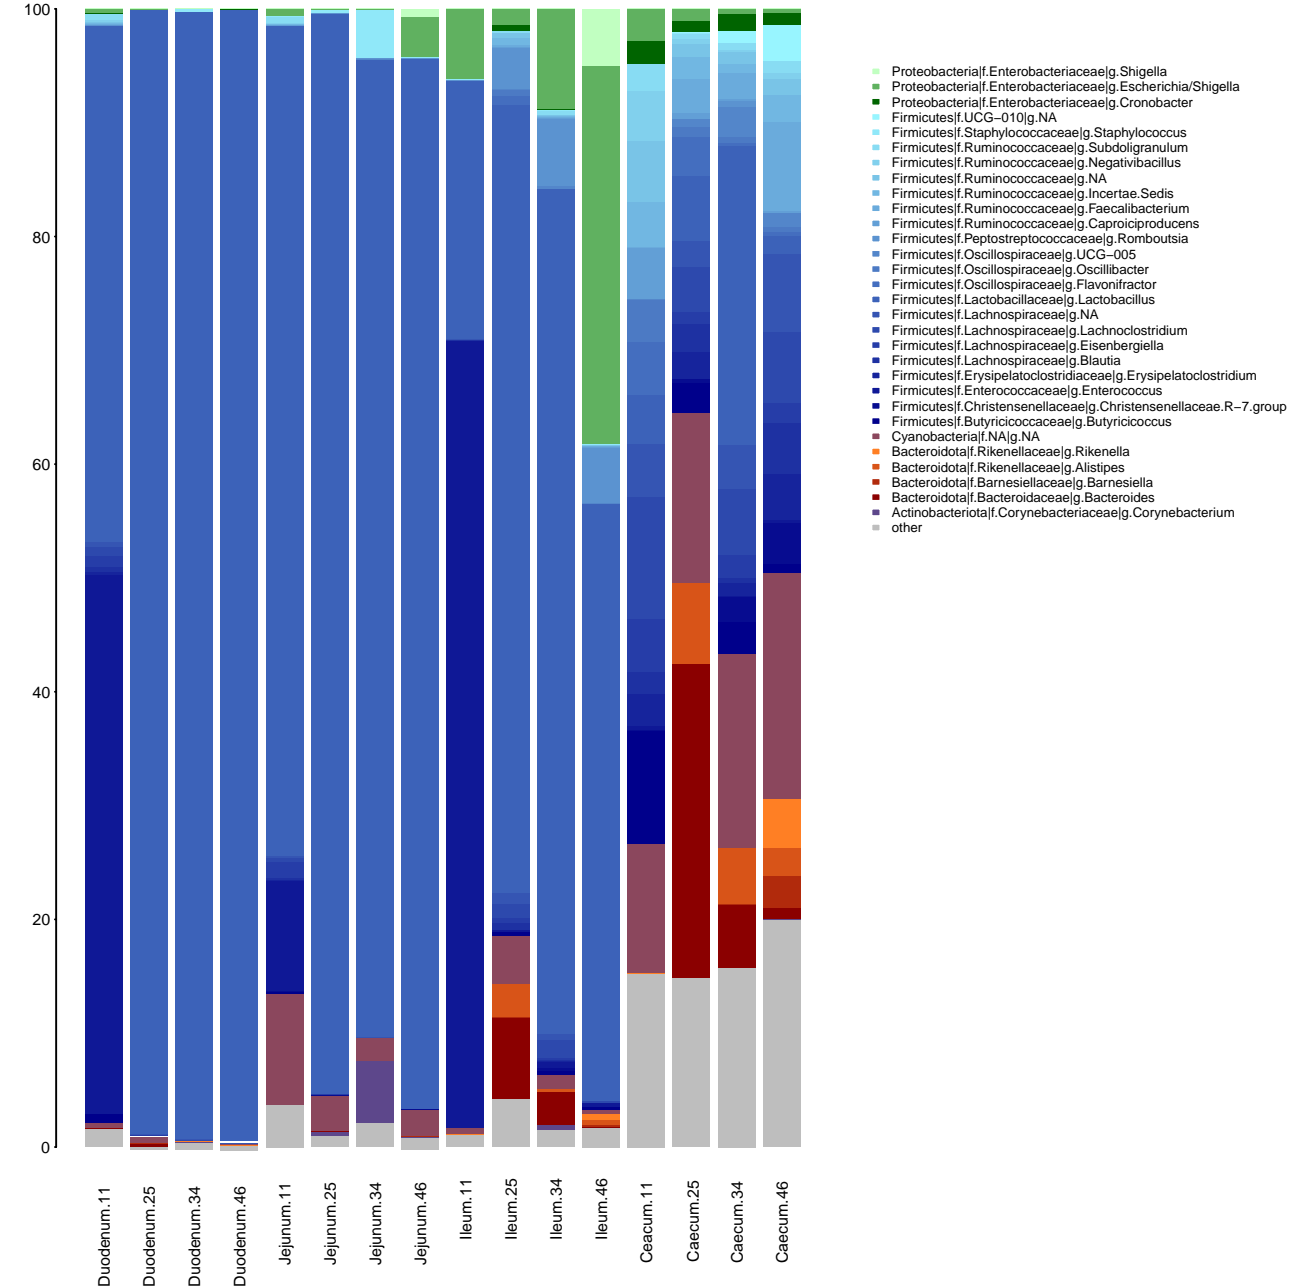

**Table S4.** Relative percentage of reads for each phylum detected in duodenum, jejunum, ileum and caecum at ages (in days) 11, 25, 34 and 46.

[illegible]

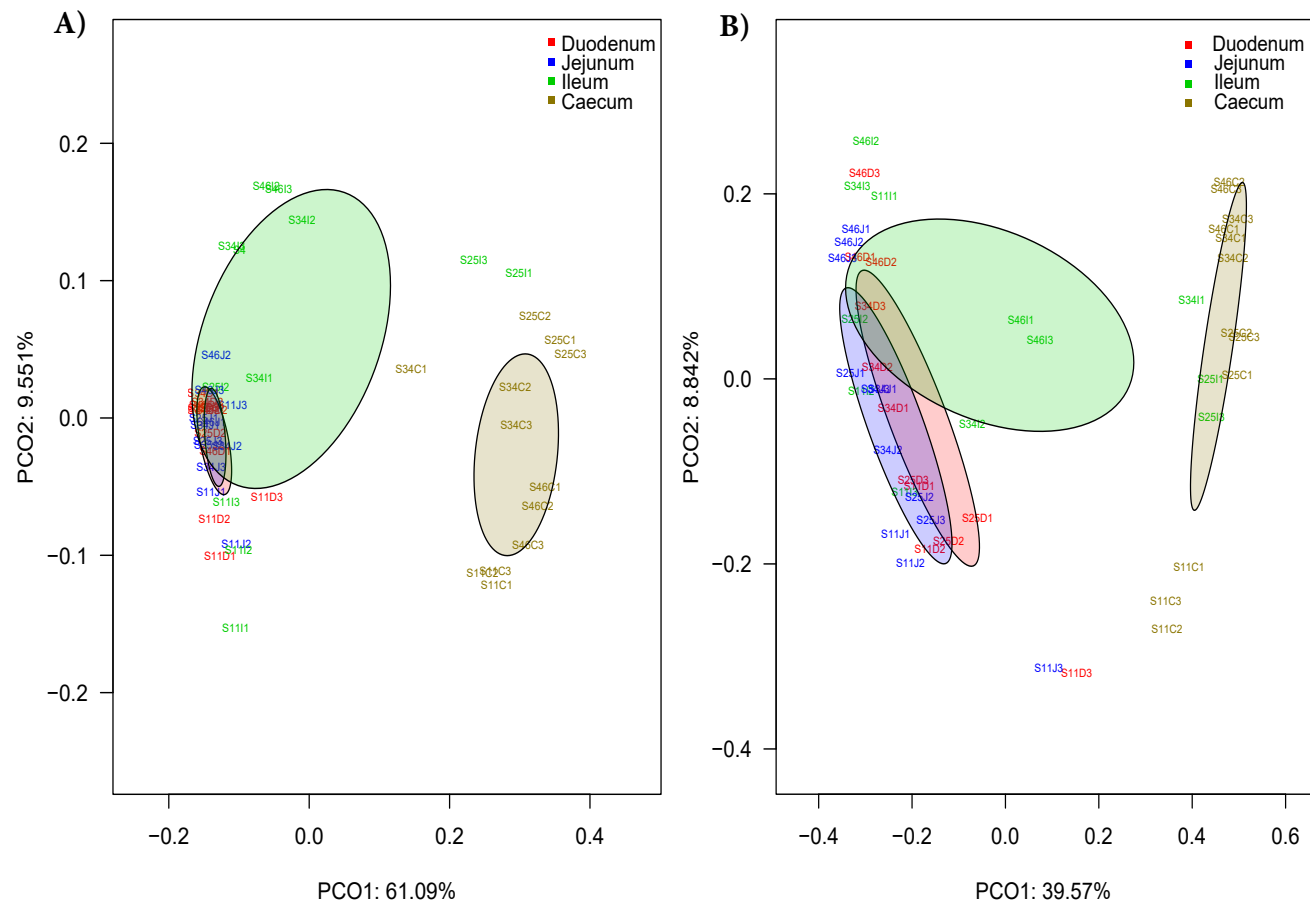

**Figure S4.** Weighted (A) and unweighted (B) PCoA of samples of the intestine segments.



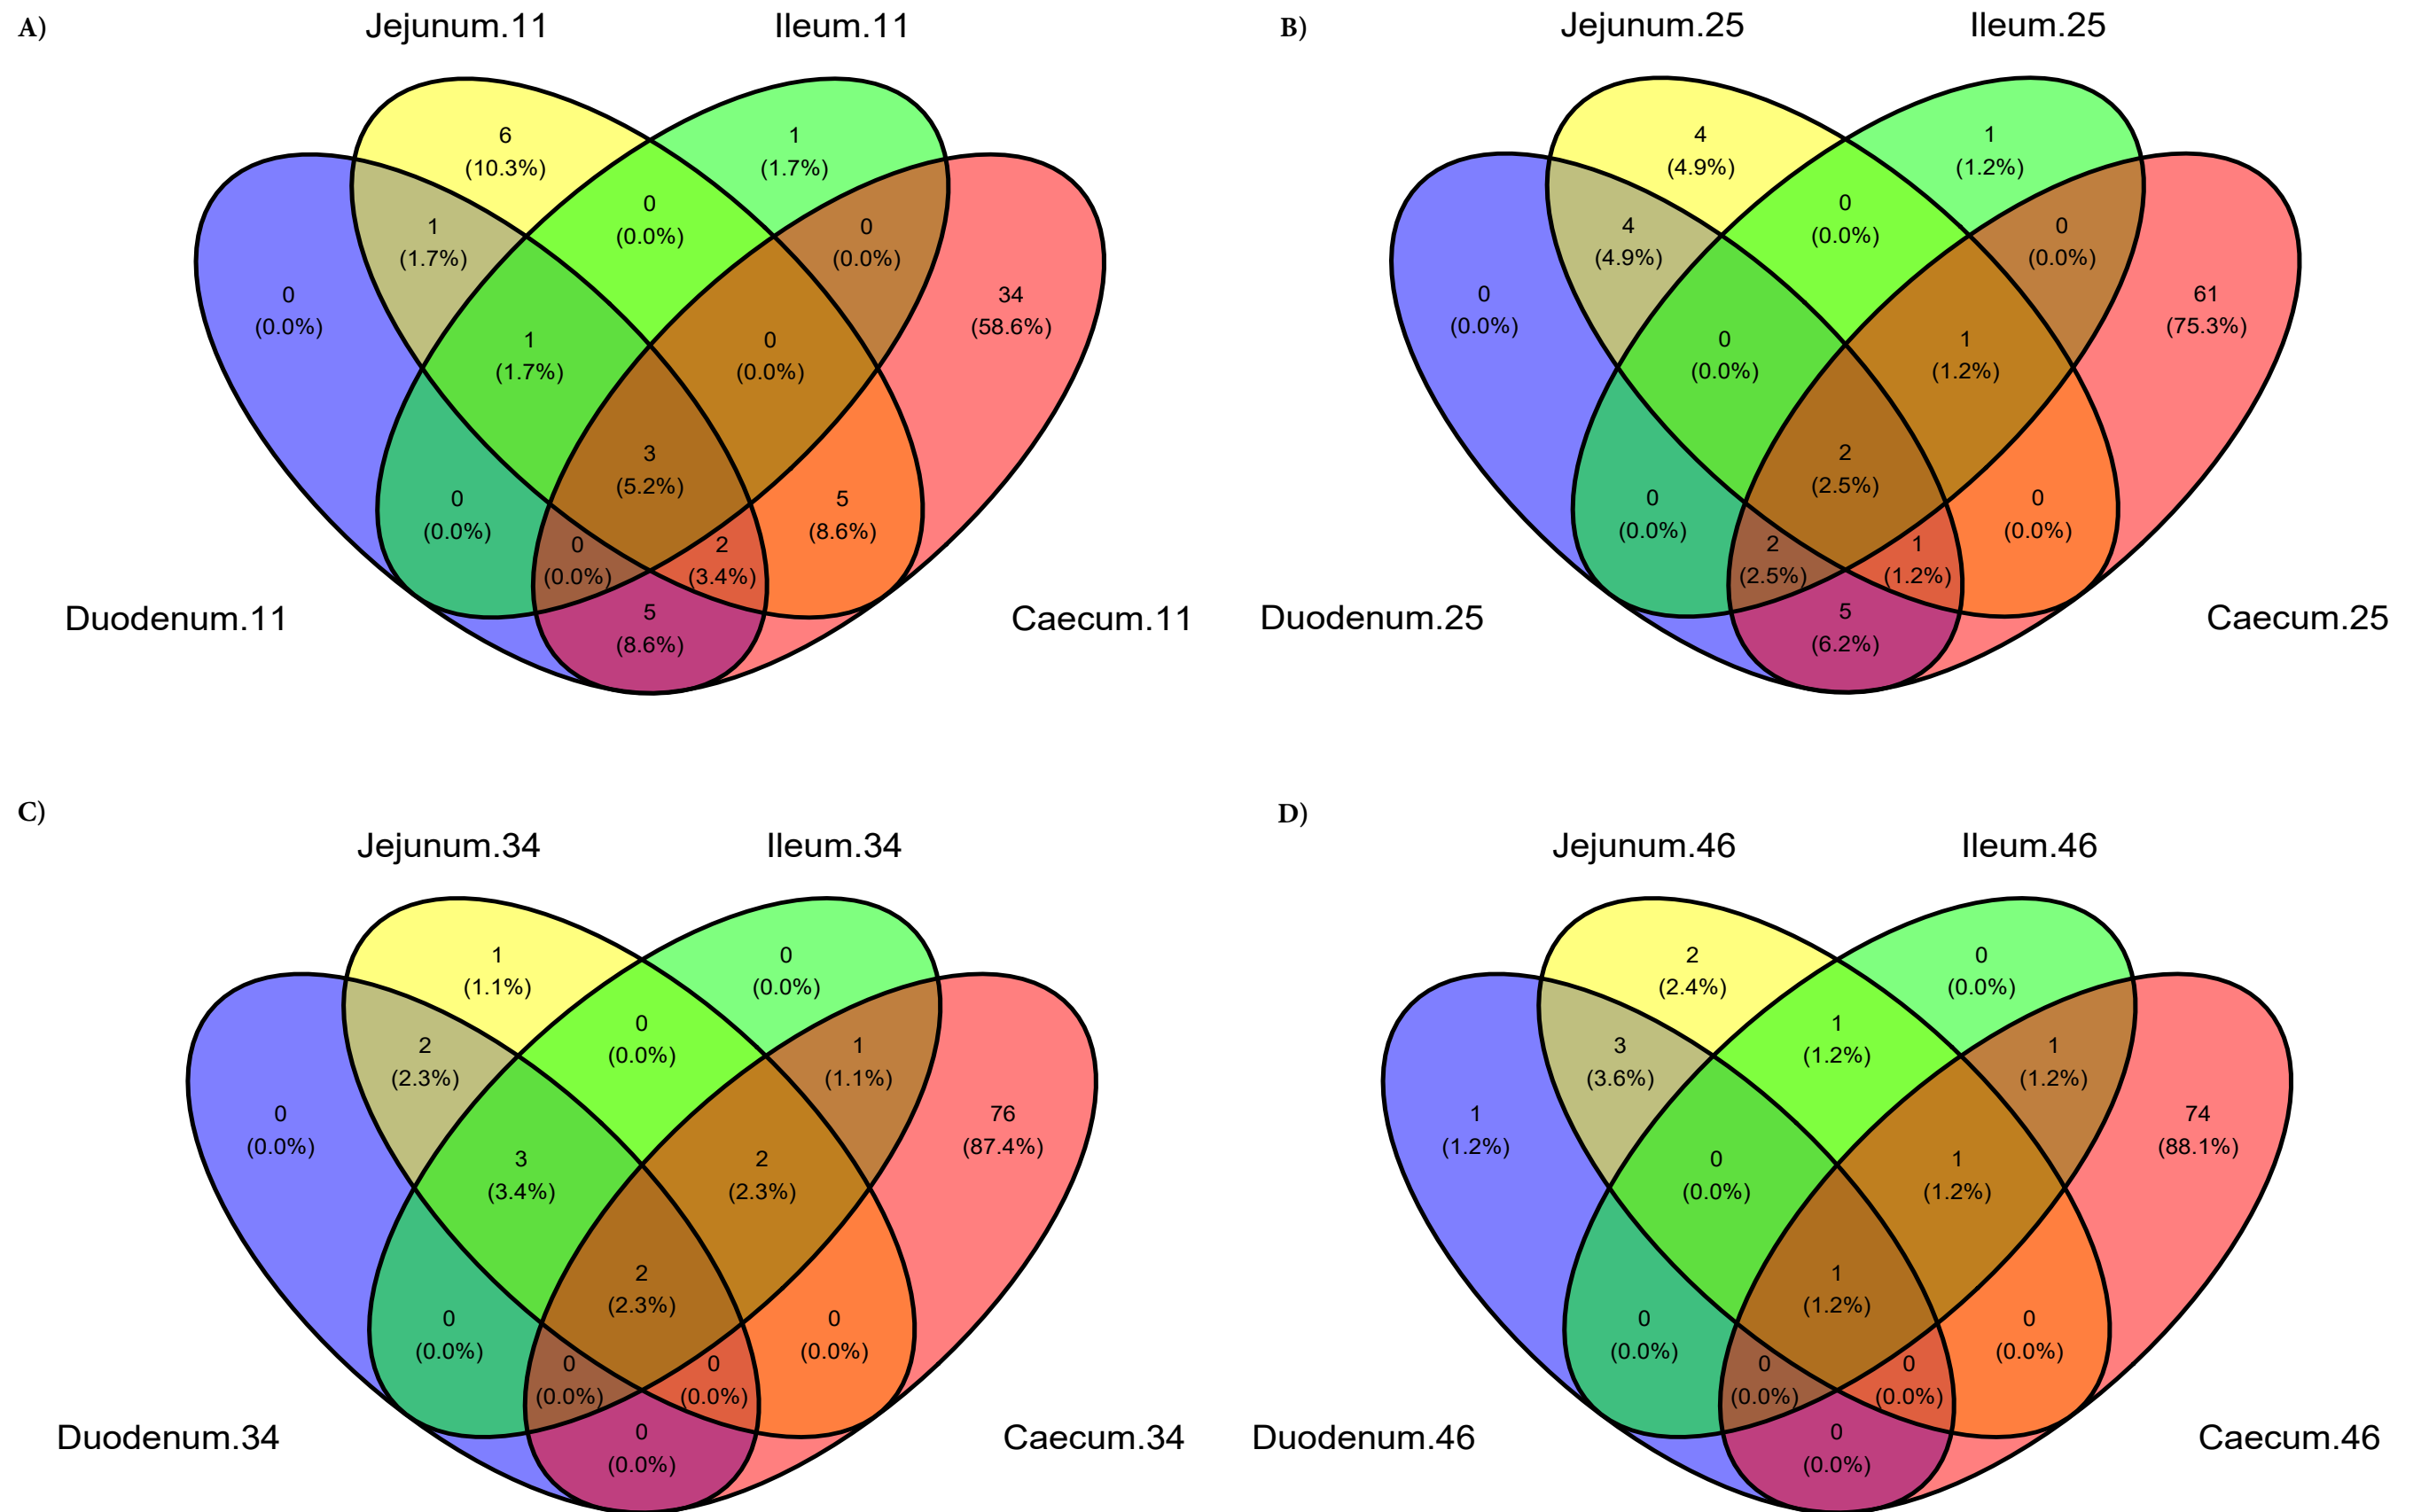

**Figure S5.** Venn diagrams of shared genus between intestine segments for each age (A:11; B: 25; C: 34; D:46).

**Table S5.** Study of the core microbiota. It is indicated unique genera present for each intestine segment at all ages, as well as shared genera present at all ages.

| Taxa                                                                                                               | Intestine segment      |
|--------------------------------------------------------------------------------------------------------------------|------------------------|
| p__Actinobacteriota;c__Actinobacteria;o__Corynebacteriales;f__Corynebacteriaceae;g__ <i>Corynebacterium</i>        | jejunum                |
| p__Firmicutes;c__Bacilli;o__Staphylococcales;f__Staphylococcaceae;g__ <i>Staphylococcus</i>                        | jejunum                |
| p__Proteobacteria;c__Alphaproteobacteria;o__Rickettsiales;f__Mitochondria;g__NA                                    | jejunum                |
| p__Firmicutes;c__Clostridia;o__Lachnospirales;f__Lachnospiraceae;g__ <i>Eisenbergiella</i>                         | caecum                 |
| p__Firmicutes;c__Bacilli;o__Erysipelotrichales;f__Erysipelatoclostridiaceae;g__ <i>Erysipelatoclostridium</i>      | caecum                 |
| p__Firmicutes;c__Clostridia;o__Oscillospirales;f__Oscillospiraceae;g__ <i>Colidextribacter</i>                     | caecum                 |
| p__Firmicutes;c__Clostridia;o__Clostridiales;f__Lachnospiraceae;g__ <i>Lachnoclostridium</i>                       | caecum                 |
| p__Firmicutes;c__Clostridia;o__Oscillospirales;f__Ruminococcaceae;g__ <i>Incertae Sedis</i>                        | caecum                 |
| p__Firmicutes;c__Clostridia;o__Oscillospirales;f__Butyricicoccaceae;g__ <i>Butyricicoccus</i>                      | caecum                 |
| p__Firmicutes;c__Clostridia;o__Lachnospirales;f__Lachnospiraceae;g__ <i>Shuttleworthia</i>                         | caecum                 |
| p__Firmicutes;c__Clostridia;o__Oscillospirales;f__Oscillospiraceae;g__ <i>Oscillibacter</i>                        | caecum                 |
| p__Firmicutes;c__Clostridia;o__Oscillospirales;f__Ruminococcaceae;g__DTU089                                        | caecum                 |
| p__Firmicutes;c__Clostridia;o__Oscillospirales;f__Oscillospiraceae;g__ <i>Flavonifractor</i>                       | caecum                 |
| p__Firmicutes;c__Clostridia;o__Oscillospirales;f__Ruminococcaceae;g__ <i>Negativibacillus</i>                      | caecum                 |
| p__Firmicutes;c__Clostridia;o__Lachnospirales;f__Lachnospiraceae;g__ <i>Tuzzerella</i>                             | caecum                 |
| p__Firmicutes;c__Clostridia;o__Lachnospirales;f__Lachnospiraceae;g__ <i>Lachnoclostridium</i>                      | caecum                 |
| p__Firmicutes;c__Clostridia;o__Oscillospirales;f__Ruminococcaceae;g__ <i>Subdoligranulum</i>                       | caecum                 |
| p__Proteobacteria;c__Gammaproteobacteria;o__Enterobacterales;f__Enterobacteriaceae;g__ <i>Cronobacter</i>          | caecum                 |
| p__Firmicutes;c__Clostridia;o__Lachnospirales;f__Lachnospiraceae;g__GCA-900066575                                  | caecum                 |
| p__Firmicutes;c__Clostridia;o__Oscillospirales;f__Ruminococcaceae;g__ <i>Caproiciproducens</i>                     | caecum                 |
| p__Firmicutes;c__Clostridia;o__Oscillospirales;f__Oscillospiraceae;g__UCG-005                                      | caecum                 |
| p__Firmicutes;c__Clostridia;o__Lachnospirales;f__Lachnospiraceae;g__ <i>Sellimonas</i>                             | caecum                 |
| p__Firmicutes;c__Clostridia;o__Lachnospirales;f__Lachnospiraceae;g__ <i>Blautia</i>                                | caecum                 |
| p__Firmicutes;c__Clostridia;o__Lachnospirales;f__Lachnospiraceae;g__ <i>Lachnospiraceae</i> _UCG-010               | caecum                 |
| p__Actinobacteriota;c__Coriobacteriia;o__Coriobacteriales;f__Eggerthellaceae;g__CHKCI002                           | caecum                 |
| p__Firmicutes;c__Clostridia;o__Christensenellales;f__Christensenellaceae;g__ <i>Christensenellaceae</i> _R-        | caecum                 |
| p__Firmicutes;c__Clostridia;o__Lachnospirales;f__Lachnospiraceae;g__ <i>Fusicatenibacter</i>                       | caecum                 |
| p__Firmicutes;c__Clostridia;o__Oscillospirales;f__Ruminococcaceae;g__ <i>Paludicola</i>                            | caecum                 |
| p__Firmicutes;c__Clostridia;o__Monoglobales;f__Monoglobaceae;g__ <i>Monoglobus</i>                                 | caecum                 |
| p__Firmicutes;c__Bacilli;o__Erysipelotrichales;f__Erysipelotrichaceae;g__ <i>Merdibacter</i>                       | caecum                 |
| p__Firmicutes;c__Clostridia;o__Clostridia_UCG-014;f__NA;g__NA                                                      | caecum                 |
| p__Firmicutes;c__Clostridia;o__Clostridia_vadinBB60_group;f__NA;g__NA                                              | caecum                 |
| p__Firmicutes;c__Clostridia;o__Oscillospirales;f__Oscillospiraceae;g__NA                                           | caecum                 |
| p__Firmicutes;c__Clostridia;o__Oscillospirales;f__Ruminococcaceae;g__NA                                            | caecum                 |
| p__Firmicutes;c__Clostridia;o__Oscillospirales;f__NA;g__NA                                                         | caecum                 |
| p__Firmicutes;c__Clostridia;o__Lachnospirales;f__Lachnospiraceae;g__NA                                             | caecum                 |
| p__Firmicutes;c__Bacilli;o__RF39;f__NA;g__NA                                                                       | caecum                 |
| p__Firmicutes;c__Bacilli;o__Erysipelotrichales;f__Erysipelatoclostridiaceae;g__NA                                  | caecum                 |
| p__Firmicutes;c__Bacilli;o__Lactobacillales;f__Lactobacillaceae;g__ <i>Lactobacillus</i>                           | all intestine segments |
| p__Proteobacteria;c__Gammaproteobacteria;o__Enterobacterales;f__Enterobacteriaceae;g__ <i>Escherichia/Shigella</i> | ileum and caecum       |

**Table S6.** Relative number of reads  $\pm$  standard error of the mean for each taxon detected in the four intestinal segments at ages (in days) 11, 25, 34 and 46.

|                   |                           |                               | Age                       |                           |                           |                         |                         |                          |                           |                         |                          |                           |                           |                           |                          |                          |                           |                           | <i>p</i> -value   |       |       |
|-------------------|---------------------------|-------------------------------|---------------------------|---------------------------|---------------------------|-------------------------|-------------------------|--------------------------|---------------------------|-------------------------|--------------------------|---------------------------|---------------------------|---------------------------|--------------------------|--------------------------|---------------------------|---------------------------|-------------------|-------|-------|
| Phylum            | Order                     | Genus                         | 11                        |                           |                           |                         | 25                      |                          |                           |                         | 34                       |                           |                           |                           | 46                       |                          |                           |                           | Intestine Segment | Age   | TxA   |
|                   |                           |                               | Duodenum                  | Jejunum                   | Ileum                     | Caecum                  | Duodenum                | Jejunum                  | Ileum                     | Caecum                  | Duodenum                 | Jejunum                   | Ileum                     | Caecum                    | Duodenum                 | Jejunum                  | Ileum                     | Caecum                    |                   |       |       |
| Firmicutes        | Lactobacillaceae          | <i>Lactobacillus</i>          | 46.58±11.56 <sup>AB</sup> | 69.88±33.93 <sup>AB</sup> | 22.01±19.61 <sup>AB</sup> | 5.23±2.86 <sup>B</sup>  | 98.80±0.72 <sup>A</sup> | 97.77±0.83 <sup>AB</sup> | 43.82±42.85 <sup>AB</sup> | 5.89±4.02 <sup>AB</sup> | 98.98±0.72 <sup>AB</sup> | 86.06±17.83 <sup>AB</sup> | 70.44±10.58 <sup>AB</sup> | 21.33±15.66 <sup>AB</sup> | 99.44±0.27 <sup>AB</sup> | 92.53±5.41 <sup>AB</sup> | 51.73±14.80 <sup>AB</sup> | 1.58±0.84 <sup>B</sup>    | 0.010             | 0.191 | 0.536 |
| Proteobacteria    | Enterobacteriaceae        | <i>Escherichia/Shigella</i>   | 0.28±0.17 <sup>B</sup>    | 1.28±2.03 <sup>B</sup>    | 4.29±4.47 <sup>B</sup>    | 2.44±0.80 <sup>B</sup>  | 0.04±0.02 <sup>B</sup>  | 0.12±0.14 <sup>B</sup>   | 2.72±2.19 <sup>B</sup>    | 0.98±0.54 <sup>B</sup>  | 0.01±0.01 <sup>B</sup>   | 0.10±0.06 <sup>B</sup>    | 10.79±16.47 <sup>B</sup>  | 0.56±0.41 <sup>B</sup>    | 0.01±0.02 <sup>B</sup>   | 6.25±5.24 <sup>B</sup>   | 39.62±14.83 <sup>A</sup>  | 0.26±0.25 <sup>B</sup>    | 0.001             | 0.009 | 0.002 |
| Firmicutes        | Enterococcaceae           | <i>Enterococcus</i>           | 47.01±18.04 <sup>A</sup>  | 23.10±32.47 <sup>BC</sup> | 72.51±21.10 <sup>AB</sup> | 0.58±0.68 <sup>C</sup>  | 0.00±0.00 <sup>C</sup>  | 0.04±0.03 <sup>C</sup>   | 0.10±0.04 <sup>C</sup>    | 0.01±0.02 <sup>C</sup>  | 0.03±0.05 <sup>C</sup>   | 0.03±0.04 <sup>C</sup>    | 0.83±1.16 <sup>C</sup>    | 0.06±0.03 <sup>C</sup>    | 0.02±0.02 <sup>C</sup>   | 0.02±0.02 <sup>C</sup>   | 0.38±0.49 <sup>C</sup>    | 0.28±0.28 <sup>C</sup>    | 0.014             | 0.000 | 0.000 |
| Bacteroidetes     | Bacteroidaceae            | <i>Bacteroides</i>            | 0.01±0.02 <sup>B</sup>    | 0.005±0.01 <sup>B</sup>   | 0.00±0.00 <sup>B</sup>    | 0.00±0.00 <sup>B</sup>  | 0.31±0.11 <sup>B</sup>  | 0.03±0.01 <sup>B</sup>   | 15.70±13.58 <sup>B</sup>  | 27.70±2.23 <sup>A</sup> | 0.00±0.00 <sup>B</sup>   | 0.00±0.00 <sup>B</sup>    | 4.98±8.26 <sup>B</sup>    | 6.48±2.95 <sup>B</sup>    | 0.00±0.00 <sup>B</sup>   | 0.00±0.00 <sup>B</sup>   | 0.05±0.06 <sup>B</sup>    | 1.10±0.38 <sup>B</sup>    | 0.003             | 0.000 | 0.000 |
| Firmicutes        | Lachnospiraceae           | <i>Lachnoclostridium</i>      | 0.99±1.45 <sup>C</sup>    | 0.45±0.20 <sup>C</sup>    | 0.05±0.08 <sup>C</sup>    | 20.53±2.67 <sup>A</sup> | 0.14±0.14 <sup>C</sup>  | 0.06±0.05 <sup>C</sup>   | 9.65±8.38 <sup>ABC</sup>  | 16.87±3.29 <sup>A</sup> | 0.03±0.02 <sup>C</sup>   | 0.02±0.01 <sup>C</sup>    | 1.54±2.60 <sup>BC</sup>   | 20.90±6.41 <sup>AB</sup>  | 0.00±0.01 <sup>C</sup>   | 0.00±0.00 <sup>C</sup>   | 0.34±0.43 <sup>C</sup>    | 21.56±2.99 <sup>ABC</sup> | 0.000             | 0.060 | 0.238 |
| Firmicutes        | Lachnospiraceae           | <i>Eisenbergiella</i>         | 1.27±1.74 <sup>B</sup>    | 0.98±1.14 <sup>B</sup>    | 0.08±0.10 <sup>B</sup>    | 11.51±5.03 <sup>A</sup> | 0.05±0.03 <sup>B</sup>  | 0.06±0.04 <sup>B</sup>   | 2.67±2.39 <sup>B</sup>    | 3.34±1.19 <sup>B</sup>  | 0.02±0.04 <sup>B</sup>   | 0.02±0.02 <sup>B</sup>    | 0.53±0.89 <sup>B</sup>    | 6.10±2.08 <sup>AB</sup>   | 0.01±0.01 <sup>B</sup>   | 0.01±0.02 <sup>B</sup>   | 0.04±0.07 <sup>B</sup>    | 7.48±4.74 <sup>B</sup>    | 0.001             | 0.019 | 0.023 |
| Bacteroidetes     | Rikenellaceae             | <i>Alistipes</i>              | 0.00±0.00 <sup>B</sup>    | 0.000±0.00 <sup>B</sup>   | 0.00±0.00 <sup>B</sup>    | 0.00±0.00 <sup>B</sup>  | 0.05±0.05 <sup>B</sup>  | 0.00±0.01 <sup>B</sup>   | 4.60±5.79 <sup>AB</sup>   | 7.18±2.41 <sup>A</sup>  | 0.00±0.00 <sup>B</sup>   | 0.01±0.02 <sup>B</sup>    | 0.17±0.27 <sup>B</sup>    | 5.46±2.42 <sup>AB</sup>   | 0.00±0.00 <sup>B</sup>   | 0.02±0.03 <sup>B</sup>   | 0.48±0.78 <sup>B</sup>    | 2.77±1.46 <sup>B</sup>    | 0.033             | 0.003 | 0.059 |
| Firmicutes        | Butyricicoccaceae         | <i>Butyricoccus</i>           | 0.65±1.12 <sup>BC</sup>   | 0.11±0.18 <sup>BC</sup>   | 0.02±0.03 <sup>C</sup>    | 8.55±3.81 <sup>A</sup>  | 0.04±0.03 <sup>C</sup>  | 0.00±0.00 <sup>C</sup>   | 0.57±0.65 <sup>BC</sup>   | 2.66±0.32 <sup>B</sup>  | 0.00±0.01 <sup>C</sup>   | 0.00±0.00 <sup>C</sup>    | 0.25±0.30 <sup>BC</sup>   | 2.63±0.87 <sup>BC</sup>   | 0.00±0.00 <sup>C</sup>   | 0.00±0.00 <sup>C</sup>   | 0.20±0.18 <sup>C</sup>    | 0.81±0.37 <sup>BC</sup>   | 0.000             | 0.001 | 0.000 |
| Proteobacteria    | Enterobacteriaceae        | <i>Klebsiella</i>             | 0.01±0.03                 | 0.04±0.06                 | 0.27±0.38                 | 0.03±0.05               | 0.00±0.00               | 0.00±0.00                | 0.00±0.00                 | 0.00±0.00               | 0.00±0.00                | 0.00±0.00                 | 0.00±0.00                 | 0.00±0.00                 | 0.00±0.00                | 0.00±0.00                | 0.00±0.00                 | 0.00±0.00                 | 0.555             | 0.056 | 0.666 |
| Firmicutes        | Lachnospiraceae           | <i>Lachnospiraceae</i>        | 0.10±0.17 <sup>AB</sup>   | 0.17±0.29 <sup>AB</sup>   | 0.02±0.04 <sup>B</sup>    | 1.19±0.43 <sup>AB</sup> | 0.02±0.03 <sup>AB</sup> | 0.01±0.02 <sup>B</sup>   | 0.37±0.33 <sup>AB</sup>   | 1.83±1.82 <sup>A</sup>  | 0.01±0.01 <sup>B</sup>   | 0.01±0.01 <sup>B</sup>    | 0.10±0.18 <sup>AB</sup>   | 1.59±0.58 <sup>AB</sup>   | 0.00±0.01 <sup>B</sup>   | 0.00±0.00 <sup>B</sup>   | 0.01±0.02 <sup>B</sup>    | 2.08±2.59 <sup>AB</sup>   | 0.005             | 0.559 | 0.866 |
| Firmicutes        | Ruminococcaceae           | <i>Faecalibacterium</i>       | 0.07±0.07                 | 0.01±0.02                 | 0.00±0.00                 | 0.55±0.95               | 0.00±0.00               | 0.02±0.02                | 1.60±2.78                 | 2.74±3.77               | 0.00±0.00                | 0.01±0.02                 | 0.08±0.15                 | 3.05±3.24                 | 0.00±0.01                | 0.00±0.00                | 0.12±0.21                 | 10.30±10.23               | 0.006             | 0.514 | 0.758 |
| Verrucomicrobiota | Akkermansiaceae           | <i>Akkermansia</i>            | 0.00±0.00 <sup>B</sup>    | 0.00±0.00 <sup>B</sup>    | 0.00±0.00 <sup>B</sup>    | 0.00±0.00 <sup>B</sup>  | 0.00±0.00 <sup>B</sup>  | 0.00±0.00 <sup>B</sup>   | 0.00±0.00 <sup>B</sup>    | 0.00±0.00 <sup>B</sup>  | 0.00±0.00 <sup>B</sup>   | 0.00±0.00 <sup>B</sup>    | 0.00±0.00 <sup>B</sup>    | 0.00±0.00 <sup>B</sup>    | 0.00±0.00 <sup>B</sup>   | 0.00±0.00 <sup>B</sup>   | 0.02±0.04 <sup>B</sup>    | 1.10±1.20 <sup>A</sup>    | 0.199             | 0.135 | 0.091 |
| Firmicutes        | Peptostreptococcaceae     | <i>Romboutsia</i>             | 0.00±0.00 <sup>B</sup>    | 0.01±0.00 <sup>B</sup>    | 0.00±0.00 <sup>B</sup>    | 0.00±0.00 <sup>B</sup>  | 0.01±0.01 <sup>B</sup>  | 0.11±0.10 <sup>B</sup>   | 1.77±2.94 <sup>AB</sup>   | 0.02±0.02 <sup>B</sup>  | 0.00±0.01 <sup>B</sup>   | 0.20±0.32 <sup>B</sup>    | 7.23±8.03 <sup>A</sup>    | 0.35±0.58 <sup>B</sup>    | 0.00±0.01 <sup>B</sup>   | 0.07±0.07 <sup>B</sup>   | 4.41±5.17 <sup>AB</sup>   | 0.01±0.01 <sup>B</sup>    | 0.002             | 0.167 | 0.193 |
| Firmicutes        | Ruminococcaceae           | <i>Ruminococcus</i>           | 0.09±0.015 <sup>C</sup>   | 0.01±0.02 <sup>C</sup>    | 0.00±0.00 <sup>C</sup>    | 5.05±1.30 <sup>A</sup>  | 0.01±0.01 <sup>C</sup>  | 0.00±0.01 <sup>C</sup>   | 0.97±1.18 <sup>BC</sup>   | 2.23±0.52 <sup>AB</sup> | 0.00±0.01 <sup>C</sup>   | 0.01±0.01 <sup>C</sup>    | 0.11±0.18 <sup>C</sup>    | 2.08±0.11 <sup>BC</sup>   | 0.00±0.00 <sup>C</sup>   | 0.00±0.00 <sup>C</sup>   | 0.05±0.04 <sup>C</sup>    | 2.01±0.67 <sup>BC</sup>   | 0.000             | 0.001 | 0.000 |
| Firmicutes        | Ruminococcaceae           | <i>Incertae_Sedis</i>         | 0.06±0.07 <sup>C</sup>    | 0.04±0.04 <sup>C</sup>    | 0.01±0.01 <sup>C</sup>    | 3.74±0.40 <sup>A</sup>  | 0.00±0.00 <sup>C</sup>  | 0.00±0.01 <sup>C</sup>   | 1.02±0.97 <sup>BC</sup>   | 1.91±0.38 <sup>AB</sup> | 0.00±0.00 <sup>C</sup>   | 0.00±0.00 <sup>C</sup>    | 0.06±0.09 <sup>C</sup>    | 1.06±0.32 <sup>BC</sup>   | 0.00±0.00 <sup>C</sup>   | 0.00±0.00 <sup>C</sup>   | 0.00±0.00 <sup>C</sup>    | 2.32±0.74 <sup>BC</sup>   | 0.000             | 0.004 | 0.001 |
| Firmicutes        | Erysipelatoclostridiaceae | <i>Erysipelatoclostridium</i> | 0.23±0.032 <sup>B</sup>   | 0.14±0.08 <sup>B</sup>    | 0.01±0.01 <sup>B</sup>    | 2.18±0.96 <sup>AB</sup> | 0.01±0.01 <sup>B</sup>  | 0.00±0.00 <sup>B</sup>   | 0.29±0.34 <sup>B</sup>    | 2.34±1.16 <sup>A</sup>  | 0.00±0.00 <sup>B</sup>   | 0.00±0.00 <sup>B</sup>    | 0.09±0.12 <sup>B</sup>    | 1.19±0.08 <sup>AB</sup>   | 0.00±0.00 <sup>B</sup>   | 0.00±0.00 <sup>B</sup>   | 0.03±0.06 <sup>B</sup>    | 3.97±2.57 <sup>AB</sup>   | 0.015             | 0.152 | 0.105 |
| Firmicutes        | Oscillospiraceae          | <i>Flavonifractor</i>         | 0.06±0.06 <sup>C</sup>    | 0.04±0.06 <sup>C</sup>    | 0.02±0.03 <sup>C</sup>    | 5.64±0.55 <sup>AB</sup> | 0.00±0.00 <sup>C</sup>  | 0.01±0.01 <sup>C</sup>   | 1.70±1.70 <sup>BC</sup>   | 4.47±2.17 <sup>A</sup>  | 0.00±0.00 <sup>C</sup>   | 0.00±0.00 <sup>C</sup>    | 0.08±0.07 <sup>C</sup>    | 0.92±0.31 <sup>C</sup>    | 0.00±0.00 <sup>C</sup>   | 0.00±0.00 <sup>C</sup>   | 0.11±0.12 <sup>C</sup>    | 2.05±1.15 <sup>C</sup>    | 0.000             | 0.005 | 0.007 |
| Firmicutes        | Leuconostocaceae          | <i>Weissella</i>              | 0.01±0.01 <sup>B</sup>    | 0.17±0.18 <sup>A</sup>    | 0.05±0.05 <sup>AB</sup>   | 0.00±0.00 <sup>B</sup>  | 0.00±0.00 <sup>B</sup>  | 0.02±0.04 <sup>B</sup>   | 0.00±0.00 <sup>B</sup>    | 0.00±0.00 <sup>B</sup>  | 0.02±0.02 <sup>B</sup>   | 0.07±0.10 <sup>AB</sup>   | 0.01±0.01 <sup>B</sup>    | 0.01±0.01 <sup>B</sup>    | 0.00±0.00 <sup>B</sup>   | 0.01±0.01 <sup>B</sup>   | 0.00±0.00 <sup>B</sup>    | 0.00±0.00 <sup>B</sup>    | 0.029             | 0.012 | 0.142 |
| Firmicutes        | Ruminococcaceae           | <i>Subdoligranulum</i>        | 0.47±0.67 <sup>B</sup>    | 0.34±0.37 <sup>B</sup>    | 0.03±0.06 <sup>B</sup>    | 3.52±1.97 <sup>A</sup>  | 0.00±0.00 <sup>B</sup>  | 0.02±0.02 <sup>B</sup>   | 0.43±0.51 <sup>B</sup>    | 0.50±0.08 <sup>B</sup>  | 0.00±0.00 <sup>B</sup>   | 0.00±0.00 <sup>B</sup>    | 0.43±0.65 <sup>B</sup>    | 0.66±0.05 <sup>B</sup>    | 0.00±0.00 <sup>B</sup>   | 0.00±0.00 <sup>B</sup>   | 0.04±0.04 <sup>B</sup>    | 1.12±0.25 <sup>B</sup>    | 0.007             | 0.010 | 0.035 |
| Firmicutes        | Oscillospiraceae          | <i>Colidextribacter</i>       | 0.04±0.04 <sup>C</sup>    | 0.00±0.00 <sup>C</sup>    | 0.00±0.00 <sup>C</sup>    | 2.30±0.55 <sup>A</sup>  | 0.01±0.01 <sup>C</sup>  | 0.00±0.00 <sup>C</sup>   | 0.73±0.92 <sup>ABC</sup>  | 1.17±0.10 <sup>AB</sup> | 0.00±0.00 <sup>C</sup>   | 0.00±0.00 <sup>C</sup>    | 0.04±0.07 <sup>C</sup>    | 0.79±0.10 <sup>BC</sup>   | 0.00±0.00 <sup>C</sup>   | 0.00±0.00 <sup>C</sup>   | 0.02±0.04 <sup>C</sup>    | 0.44±0.21 <sup>C</sup>    | 0.000             | 0.007 | 0.005 |
| Firmicutes        | Staphylococcaceae         | <i>Staphylococcus</i>         | 0.03±0.04 <sup>B</sup>    | 0.16±0.09 <sup>B</sup>    | 0.06±0.06 <sup>B</sup>    | 0.00±0.00 <sup>B</sup>  | 0.03±0.02 <sup>B</sup>  | 0.22±0.10 <sup>B</sup>   | 0.01±0.01 <sup>B</sup>    | 0.00±0.00 <sup>B</sup>  | 0.25±0.20 <sup>B</sup>   | 4.79±5.82 <sup>A</sup>    | 0.08±0.08 <sup>B</sup>    | 0.01±0.01 <sup>B</sup>    | 0.04±0.01 <sup>B</sup>   | 0.09±0.02 <sup>B</sup>   | 0.01±0.01 <sup>B</sup>    | 0.00±0.00 <sup>B</sup>    | 0.113             | 0.100 | 0.111 |
| Firmicutes        | Oscillospiraceae          | <i>Oscillibacter</i>          | 0.03±0.03 <sup>C</sup>    | 0.02±0.02 <sup>C</sup>    | 0.00±0.00 <sup>C</sup>    | 5.21±1.39 <sup>A</sup>  | 0.01±0.01 <sup>C</sup>  | 0.00±0.00 <sup>C</sup>   | 1.53±1.59 <sup>BC</sup>   | 2.59±0.44 <sup>AB</sup> | 0.00±0.00 <sup>C</sup>   | 0.00±0.00 <sup>C</sup>    | 0.16±0.14 <sup>C</sup>    | 2.09±0.34 <sup>BC</sup>   | 0.00±0.00 <sup>C</sup>   | 0.00±0.00 <sup>C</sup>   | 0.07±0.07 <sup>C</sup>    | 1.83±0.35 <sup>C</sup>    | 0.000             | 0.002 | 0.001 |
| Proteobacteria    | Enterobacteriaceae        | <i>Cronobacter</i>            | 0.10±0.17                 | 0.00±0.00                 | 0.00±0.00                 | 1.15±1.23               | 0.02±0.03               | 0.00±0.00                | 1.37±1.24                 | 0.96±0.43               | 0.00±0.00                | 0.00±0.00                 | 0.03±0.04                 | 1.84±1.44                 | 0.00±0.00                | 0.00±0.00                | 0.02±0.02                 | 1.06±0.58                 | 0.035             | 0.109 | 0.209 |
| Actinobacteriota  | Corynebacteriaceae        | <i>Corynebacterium</i>        | 0.02±0.02                 | 0.07±0.09                 | 0.00±0.00                 | 0.00±0.00               | 0.02±0.02               | 0.43±0.34                | 0.01±0.01                 | 0.00±0.00               | 0.10±0.08                | 6.29±8.69                 | 0.50±0.53                 | 0.03±0.06                 | 0.05±0.03                | 0.16±0.09                | 0.03±0.03                 | 0.00±0.00                 | 0.211             | 0.124 | 0.235 |
| Firmicutes        | Christensenellaceae       | <i>Christensenellaceae</i>    | 0.01±0.02 <sup>B</sup>    | 0.01±0.02 <sup>B</sup>    | 0.00±0.00 <sup>B</sup>    | 0.06±0.04 <sup>B</sup>  | 0.00±0.00 <sup>B</sup>  | 0.00±0.00 <sup>B</sup>   | 0.15±0.16 <sup>B</sup>    | 0.39±0.04 <sup>B</sup>  | 0.00±0.00 <sup>B</sup>   | 0.01±0.01 <sup>B</sup>    | 0.18±0.31 <sup>B</sup>    | 2.27±0.55 <sup>A</sup>    | 0.00±0.00 <sup>B</sup>   | 0.00±0.00 <sup>B</sup>   | 0.04±0.05 <sup>B</sup>    | 3.44±0.83 <sup>A</sup>    | 0.001             | 0.005 | 0.001 |
| Firmicutes        | Lachnospiraceae           | <i>Blautia</i>                | 0.38±0.66                 | 0.28±0.30                 | 0.022±0.04                | 1.392±0.70              | 0.03±0.03               | 0.03±0.03                | 0.98±1.16                 | 2.56±2.85               | 0.00±0.00                | 0.00±0.01                 | 0.02±0.04                 | 0.48±0.09                 | 0.01±0.01                | 0.00±0.00                | 0.01±0.01                 | 3.44±4.93                 | 0.012             | 0.453 | 0.802 |
| Firmicutes        | Lachnospiraceae           | <i>Tuzzerella</i>             | 0.03±0.04                 | 0.05±0.01                 | 0.000±0.00                | 1.769±2.11              | 0.02±0.02               | 0.01±0.02                | 0.30±0.39                 | 1.05±0.18               | 0.00±0.00                | 0.00±0.00                 | 0.15±0.14                 | 0.92±0.44                 | 0.00±0.00                | 0.00±0.00                | 0.00±0.01                 | 0.72±0.61                 | 0.016             | 0.460 | 0.628 |
|                   | other                     |                               | 1.45±1.75 <sup>DE</sup>   | 2.68±1.65 <sup>CDE</sup>  | 0.563±0.55 <sup>E</sup>   | 17.386±                 |                         |                          |                           |                         |                          |                           |                           |                           |                          |                          |                           |                           |                   |       |       |

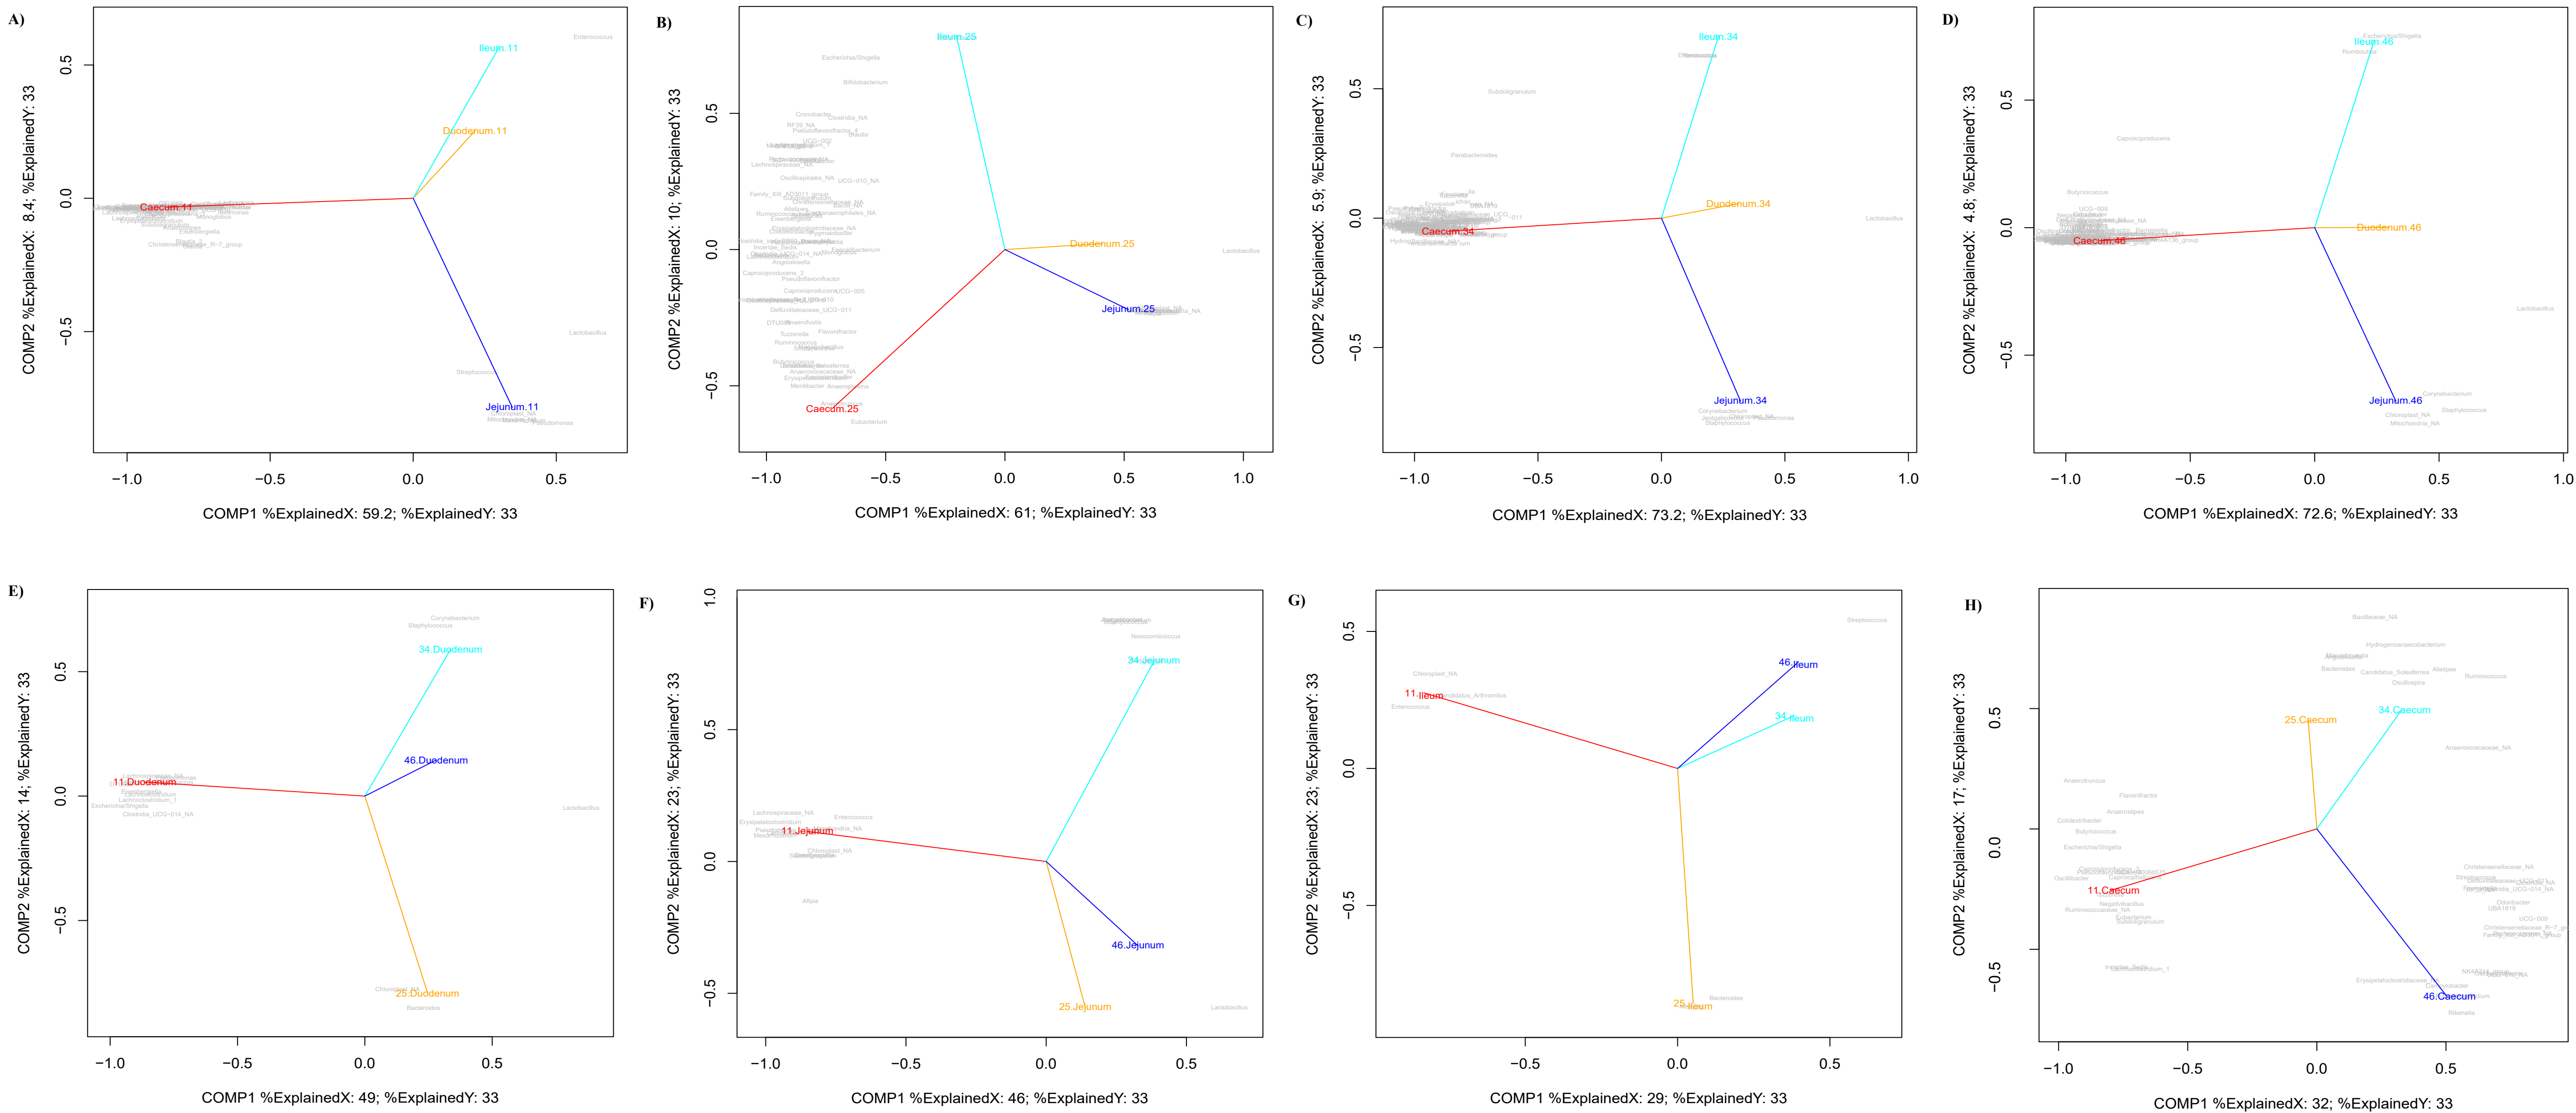

**Figure S8.** Biplots of the PLS-DA analysis for each age (A-D) and kg group (E-H).

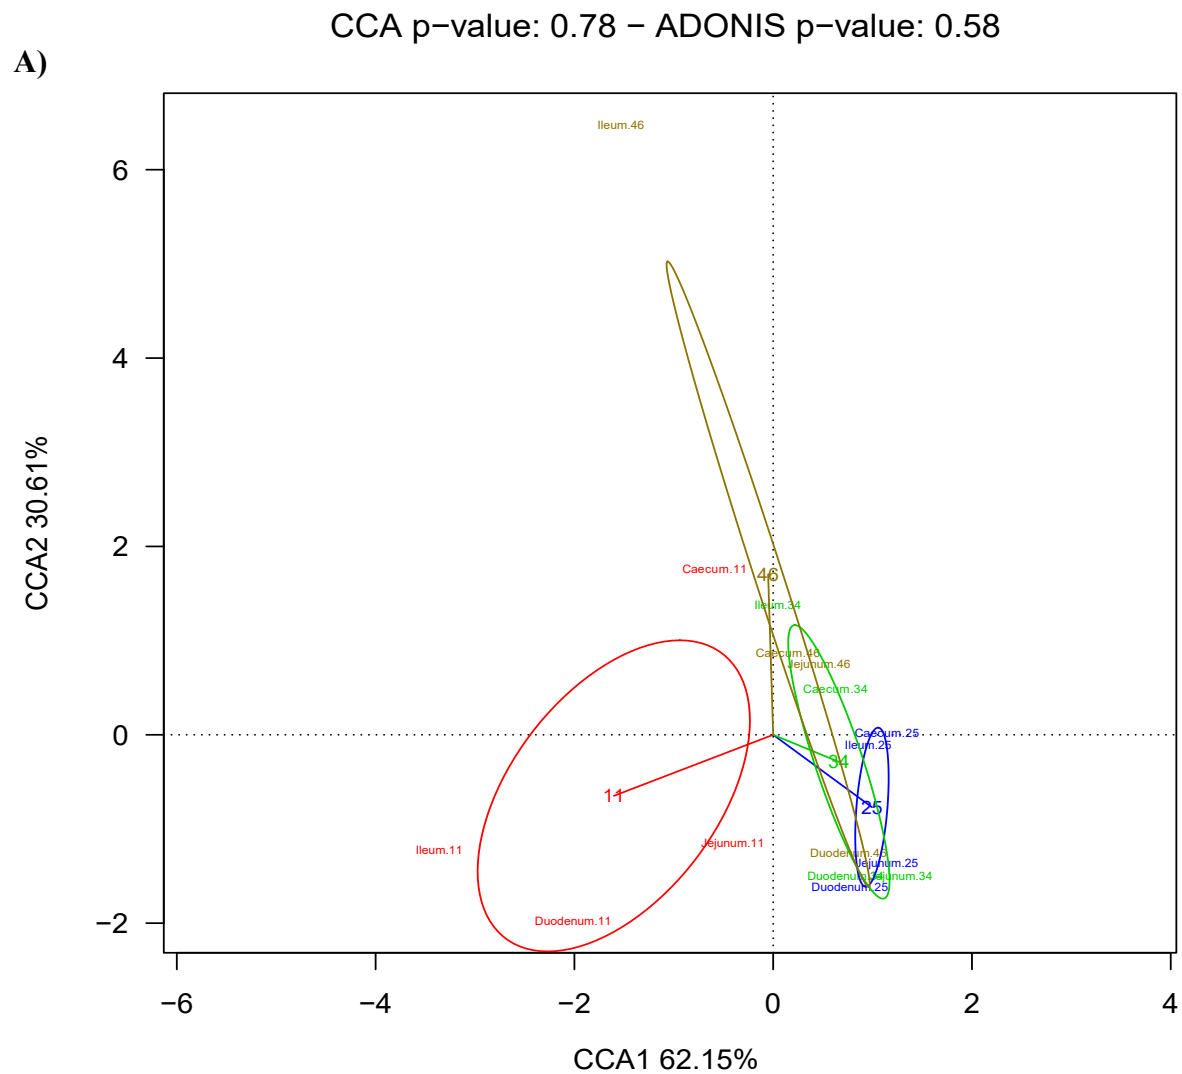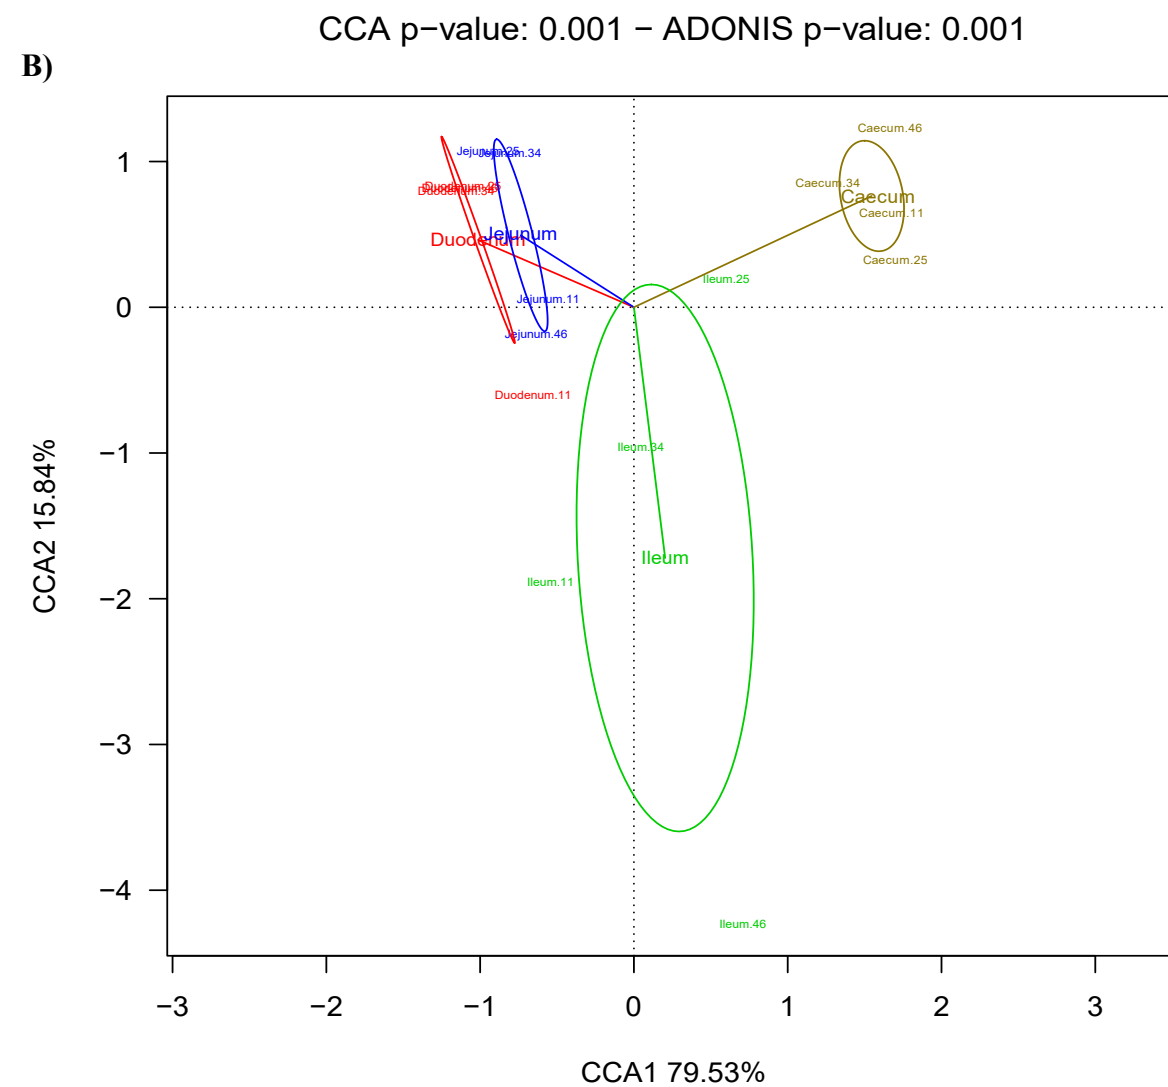

**Figure S7.** CCA analyses of pathways abundances by age (A) and by intestine segment (B)
